# Supplementary material for: Instant on-paper protein digestion during blood spot sampling
Source: Royal Society of Chemistry journal article supplement (doi:10.1039/c7an01075c), 2017-01-01
Supplement: c7an01075c1.pdf [file c7an01075c1.pdf]

## Supplementary

### Instant on-paper protein digestion during blood spot sampling

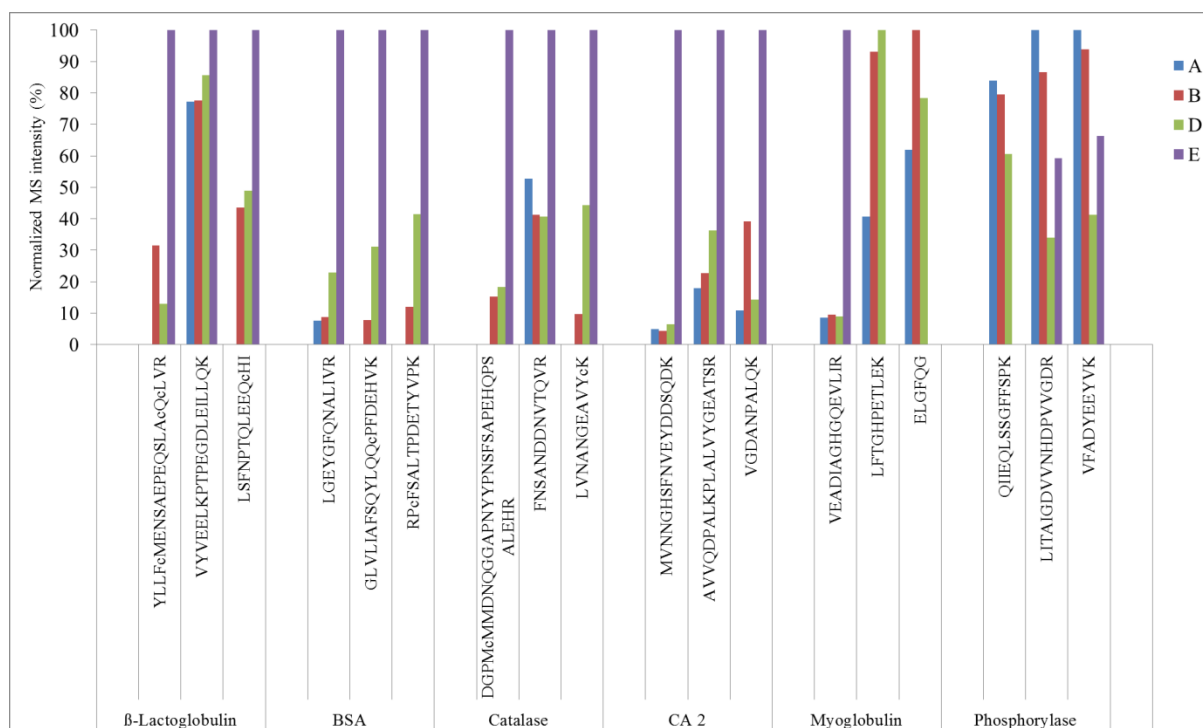

**Fig.9** Normalized MS intensities (average for each protein with respect to the highest abundant peptide, n = 6) for each peptide sequence prepared regarding five preparing variations (**Fig.2**)
